# Supplementary material for: Predictive factors of radiological progression after 2 years of remission-steered treatment in early arthritis patients: a post hoc analysis of the IMPROVED study
Source: PubMed Central journal article supplement — RMD Open. 2016 Feb 15;2(1):e000172. doi: 10.1136/rmdopen-2015-000172 (PMC4762208; doi:10.1136/rmdopen-2015-000172), 2016-02-15
Supplement: rmdopen-2015-000172supp_table.pdf [file rmdopen-2015-000172supp_table.pdf]

**SUPPLEMENTARY FILE**

Supplementary table 1: Treatment steps during 2 years of follow up in patients with SHS progression n=50

| Patient | Progression score | Treatment group | RF      | ACPA | Anti-CarP | DAS 8 mths | Treatment step           | DAS 12 mths | Treatment step                                       | DAS 16 mths | Treatment step                   | DAS 20 mths | Treatment step                   | DAS 24 mths |
|---------|-------------------|-----------------|---------|------|-----------|------------|--------------------------|-------------|------------------------------------------------------|-------------|----------------------------------|-------------|----------------------------------|-------------|
| 1       | 0.5               | ER              | -       | +    | -         | 0.59       | MTX tapered to 0         | 2.04        | Restart MTX                                          | 1.69        | MTX monotherapy                  | 2.03        | Restart prednisone               | 0.59        |
| 2       | 0.5               | Arm 2           | missing | -    | -         | 3.16       | Increase dose adalimumab | 2.42        | MTX + adalimumab                                     | ND          | ND                               | 1.82        | MTX + adalimumab                 | 1.15        |
| 3       | 0.5               | ER              | -       | -    | -         | 0.79       | Restart prednisone       | 1.90        | Prednisone tapered to 0                              | 3.10        | Randomization : start adalimumab | 1.02        | Adalimumab tapered to 0          | ND          |
| 4       | 0.5               | ER              | -       | -    | missing   | 0.95       | MTX tapered to 0         | 1.18        | DFR                                                  | 0.96        | DFR                              | 0.99        | DFR                              | ND          |
| 5       | 0.5               | Arm 1           | -       | -    | -         | 1.66       | DMARD combination        | 2.22        | DMARD combination tapered to 0, switch to adalimumab | 2.41        | Increase dose adalimumab         | 2.54        | Step unclear                     | 1.96        |
| 6       | 0.5               | Arm 1           | -       | -    | +         | 1.36       | DMARD combination        | 1.33        | DMARD combination tapered to 0                       | 1.35        | MTX decrease dose                | 1.59        | MTX decrease dose                | 1.19        |
| 7       | 0.5               | ER              | +       | +    | -         | 0.47       | MTX tapered to 0         | 1.54        | DFR                                                  | 4.54        | Restart MTX                      | 1.16        | MTX monotherapy                  | 1.14        |
| 8       | 0.5               | ER              | +       | +    | +         | 0.67       | MTX tapered to 0         | 1.82        | Restart MTX                                          | 1.70        | Restart prednisone               | 1.75        | Randosmization: start adalimumab | 1.55        |
| 9       | 0.5               | ER              | +       | +    | +         | 0.25       | MTX tapered to 0         | 0.26        | DFR                                                  | 0.03        | DFR                              | 0.27        | DFR                              | 1.01        |
| 10      | 0.5               | OP              | +       | +    | -         | 3.23       | Start SSZ monotherapy    | 2.44        | SSZ was stopped short after 8 mths: DFR              | 1.35        | DFR                              | 2.74        | DF no remission                  | 2.04        |
| 11      | 0.5               | ER              | +       | +    | +         | 0.99       | MTX tapered to 0         | 1.73        | MTX restart                                          | 1.79        | Restart prednisone               | 1.03        | Prednisone tapered to 0          | 1.44        |
| 12      | 0.5               | ER              | +       | +    | -         | 1.07       | MTX decreased dose       | 1.30        | MTX monotherapy                                      | 1.25        | MTX decreased dose               | 0.56        | MTX decreased dose               | 1.32        |
| 13      | 0.5               | Arm 2           | +       | +    | -         | 2.11       | Increase dose adalimumab | 2.01        | MTX + adalimumab                                     | 1.59        | MTX + adalimumab                 | 0.90        | Decrease dose adalimumab         | 1.88        |
| 14      | 0.5               | Arm 1           | -       | -    | -         | 3.07       | DMARD                    | 1.97        | MTX +                                                | 3.11        | Increase dose                    | 3.32        | Stop                             | 2.37        |

|    |     |       |         |   |         |      |                                                      |      |                                              |      |                                            |      |                                          |      |
|----|-----|-------|---------|---|---------|------|------------------------------------------------------|------|----------------------------------------------|------|--------------------------------------------|------|------------------------------------------|------|
|    |     |       |         |   |         |      | combination tapered to 0, switch to adalimumab       |      | adalimumab                                   |      | adalimumab                                 |      | adalimumab, MTX monotherapy              |      |
| 15 | 0.5 | ER    | -       | - | -       | 0.79 | MTX tapered to 0                                     | 1.56 | Restart MTX                                  | 1.52 | MTX monotherapy                            | 0.62 | MTX monotherapy                          | 0.54 |
| 16 | 0.5 | ER    | -       | - | -       | 1.39 | MTX tapered to 0                                     | 1.59 | DFR                                          | 0.62 | DFR                                        | 0.76 | DFR                                      | 1.11 |
| 17 | 0.5 | ER    | -       | - | missing | 0.24 | MTX tapered to 0                                     | 0.78 | DFR                                          | 1.21 | DFR                                        | 1.28 | DFR                                      | 1.50 |
| 18 | 0.5 | ER    | +       | + | missing | 1.16 | Restart prednisone                                   | 0.43 | Prednisone tapered to 0                      | 1.50 | MTX tapered to 0                           | 3.20 | Restart MTX + prednisone and start HCQ   | 0.75 |
| 19 | 1   | OP    | +       | + | -       | 0.95 | MTX decreased dose                                   | 1.58 | MTX decreased dose                           | 1.19 | MTX decreased dose                         | 1.01 | MTX tapered to 0                         | 1.06 |
| 20 | 1   | ER    | -       | - | -       | 0.78 | MTX tapered to 0                                     | 3.66 | Restart MTX                                  | 1.74 | Restart prednisone                         | 0.88 | Prednisone tapered to 0                  | 0.88 |
| 21 | 1   | Arm 2 | +       | + | +       | 1.84 | Increase dose adalimumab                             | 1.71 | Decrease dose adalimumab                     | 2.44 | TAR: Stop adalimumab + prednisone bridging | 2.40 | TAR: start etanercept + MTX + prednisone | 1.70 |
| 22 | 1   | ER    | +       | + | +       | 0.82 | MTX tapered to 0                                     | 3.30 | Restart MTX                                  | 1.87 | MTX monotherapy                            | 2.73 | MTX monotherapy                          | 1.79 |
| 23 | 1   | Arm 1 | +       | + | -       | 0.99 | Combination therapy tapered to 0                     | 3.73 | Restart MTX + prednisone                     | 2.46 | Switch to adalimumab                       | 2.07 | Increase dose adalimumab                 | 1.09 |
| 24 | 1   | Arm 1 | -       | - | -       | 1.86 | Combination therapy                                  | 1.93 | Combination tapered to MTX monotherapy       | 2.41 | MTX monotherapy                            | 1.54 | MTX tapered to 0                         | 2.43 |
| 25 | 1   | ER    | +       | + | +       | 0.80 | MTX tapered to 0                                     | 0.81 | DFR                                          | 4.00 | Restart MTX + prednisone                   | 0.59 | Prednisone tapered to 0                  | 0.73 |
| 26 | 1   | ER    | +       | + | +       | 2.27 | Restart MTX                                          | 0.96 | MTX monotherapy                              | 0.86 | MTX tapered to 0                           | 1.62 | DF no remission                          | 2.90 |
| 27 | 1   | ER    | +       | + | -       | 0.61 | MTX tapered to 0                                     | 0.61 | DFR                                          | 1.34 | DFR                                        | 1.20 | DFR                                      | 0.73 |
| 28 | 1   | Arm 1 | -       | - | -       | 2.39 | DMARD combination tapered to 0, switch to adalimumab | 2.20 | Increase dose adalimumab                     | 2.08 | MTX + adalimumab tapered to 0              | 2.08 | DFR                                      | 1.21 |
| 29 | 2   | Arm 1 | missing | + | missing | 2.21 | DMARD combination tapered to 0, switch to            | 1.04 | MTX + adalimumab. Extra visit: increase dose | 1.60 | MTX + adalimumab                           | 1.77 | MTX + adalimumab                         | 2.04 |

|    |     |       |         |   |         |      |                                                                                 |      |                                          |      |                                             |      |                                                            |      |
|----|-----|-------|---------|---|---------|------|---------------------------------------------------------------------------------|------|------------------------------------------|------|---------------------------------------------|------|------------------------------------------------------------|------|
| 30 | 2   | ER    | +       | + | +       | 2.14 | adalimumab<br>Switch to SSZ,<br>continue<br>prednisone                          | 1.37 | adalimumab<br>Prednisone<br>tapered to 0 | 1.07 | SSZ<br>monotherapy                          | 1.94 | Increase dose<br>SSZ                                       | 2.41 |
| 31 | 2   | Arm 2 | +       | + | +       | 1.58 | MTX +<br>adalimumab                                                             | 2.30 | Increase dose<br>adalimumab              | 0.35 | MTX +<br>adalimumab                         | 0.27 | MTX +<br>adalimumab                                        | 0.71 |
| 32 | 2.5 | Arm 1 | +       | + | +       | 3.75 | DMARD<br>combination<br>tapered to 0,<br>switch to<br>adalimumab                | 2.48 | Increase dose<br>adalimumab              | 2.36 | Stop<br>adalimumab,<br>start<br>abatacept   | 1.05 | MTX + abatacept                                            | 3.35 |
| 33 | 2.5 | ER    | +       | + | +       | 0.88 | MTX tapered to<br>0                                                             | 1.37 | DFR                                      | 1.65 | DF no<br>remission                          | 0.78 | DFR                                                        | 0.99 |
| 34 | 2.5 | ER    | +       | + | +       | 2.09 | Restart<br>prednisone                                                           | 2.09 | MTX<br>monotherapy                       | 2.22 | MTX tapered<br>to 0                         | 3.00 | DF no remission                                            | 1.82 |
| 35 | 2.5 | Arm 1 | +       | + | +       | 2.67 | DMARD<br>combination<br>tapered to 0,<br>switch to<br>adalimumab                | 2.28 | Adalimumab<br>stopped due to<br>AE       | 2.09 | MTX +<br>adalimumab                         | 1.75 | MTX +<br>adalimumab                                        | 2.56 |
| 36 | 3   | ER    | -       | - | -       | 0.77 | MTX tapered to<br>0                                                             | 0.23 | DFR                                      | 0.83 | Restart MTX                                 | 1.56 | MTX<br>monotherapy                                         | 1.34 |
| 37 | 3   | ER    | +       | + | +       | 2.81 | Restart<br>prednisone.<br>Extra visit:<br>randomization:<br>start<br>adalimumab | 3.01 | Increase dose<br>adalimumab              | 3.73 | Stop<br>adalimumab                          | 3.07 | TAR: MTX + start<br>tocilizumab                            | 4.22 |
| 38 | 3   | OP    | -       | + | +       | 1.02 | Restart MTX                                                                     | 2.94 | MTX<br>monotherapy                       | 1.78 | Restart<br>prednisone                       | 2.28 | Prednisone<br>tapered to 0                                 | 2.43 |
| 39 | 3   | ER    | +       | + | +       | 2.32 | Restart<br>prednisone                                                           | 0.97 | Prednisone<br>tapered to 0               | 1.16 | MTX tapered<br>to 0                         | 2.10 | Restart MTX                                                | 1.73 |
| 40 | 3.5 | ER    | -       | - | -       | 2.92 | Restart<br>prednisone                                                           | 1.45 | Prednisone<br>tapered to 0               | 1.04 | MTX tapered<br>to 0                         | 1.62 | DFR                                                        | 0.95 |
| 41 | 4   | ER    | +       | + | +       | 1.71 | Restart<br>Prednisone                                                           | 1.19 | Prednisone<br>tapered to 0               | 1.44 | MTX tapered<br>to 0                         | 1.40 | DFR                                                        | 1.37 |
| 42 | 4   | ER    | +       | + | missing | 1.14 | MTX tapered to<br>0                                                             | 0.46 | DFR                                      | 0.46 | DFR                                         | 0.46 | DFR                                                        | 0.36 |
| 43 | 5   | ER    | missing | + | +       | 1.76 | Restart<br>prednisone                                                           | 0.55 | Prednisone<br>tapered to 0               | 1.70 | Randomization<br>arm 2: start<br>adalimumab | 0.46 | Adalimumab<br>tapered to 0.<br>MTX continued               | 0.38 |
| 44 | 5   | ER    | +       | + | +       | 1.73 | Restart<br>prednisone                                                           | 1.79 | Prednisone<br>tapered to 0               | 2.67 | Randomization<br>arm 2: start<br>adalimumab | ND   | Extra visit:<br>increase dose<br>adalimumab.<br>TAR: start | 3.48 |

|    |      |       |   |   |         |      |                                                                                                              |      |                                                                 |      |                                        |      |                               |      |
|----|------|-------|---|---|---------|------|--------------------------------------------------------------------------------------------------------------|------|-----------------------------------------------------------------|------|----------------------------------------|------|-------------------------------|------|
|    |      |       |   |   |         |      |                                                                                                              |      |                                                                 |      |                                        |      | etanercept + prednisone       |      |
| 45 | 5    | ER    | + | + | missing | 2.11 | MTX stopped due to AE: DF                                                                                    | 1.88 | Restart MTX + prednisone                                        | 0.85 | MTX continued. Prednisone tapered to 0 | 0.69 | MTX monotherapy               | 0.91 |
| 46 | 5    | ER    | - | - | -       | 0.94 | MTX tapered to 0                                                                                             | 0.94 | DFR                                                             | 0.75 | DFR                                    | 0.89 | DFR                           | 0.89 |
| 47 | 7.5  | Arm 2 | + | + | -       | 1.71 | Increase dose adalimumab                                                                                     | 1.23 | Decrease dose adalimumab. Extra visit: increase dose adalimumab | 3.48 | TAR: start etanercept + MTX            | 0.80 | TAR: start etanercept + MTX   | 0.86 |
| 48 | 8    | ER    | + | + | +       | 1.00 | MTX tapered to 0                                                                                             | 1.04 | DFR                                                             | 0.89 | DFR                                    | 1.64 | DF no remission               | 0.26 |
| 49 | 10.5 | ER    | + | + | -       | 1.56 | Restart prednisone                                                                                           | 0.93 | Prednisone tapererd to 0                                        | 1.45 | MTX tapered to 0                       | 1.90 | Restart MTX                   | 1.80 |
| 50 | 22   | ER    | + | + | +       | 4.04 | Extra visit after 4 mths: randomization: start adalimumab. OP: persistent activity. Start DMARD combination. | 3.81 | Prednisone + MTX + etanercept                                   | 2.52 | Prednisone + MTX + etanercept          | 2.55 | Prednisone + MTX + etanercept | 2.11 |

DAS: disease activity score; mths: months; ER: early DAS remission; OP: out of protocol; RF: rheumatoid factor; ACPA: anti-citrullinated protein antibodies; Anti-CarP: anti-carbamylated protein antibodies; +: positive; -: negative; MTX: methotrexate; DMARD: disease modifying antirheumatic drugs; SSZ: sulphasalazine; HCQ: hydroxychloroquine; DFR: drug-free remission; AE: adverse event; TAR: treatment according to rheumatologist; ND: not done.
